# Supplementary material for: APIM-Mediated REV3L–PCNA Interaction Important for Error Free TLS Over UV-Induced DNA Lesions in Human Cells
Source: PubMed Central journal article supplement (PMC6337749; doi:10.3390/ijms20010100), 2018-12-28
Supplement: ijms-20-00100-s001.pdf [file ijms-20-00100-s001.pdf]

## Supplementary material

### **APIM mediated REV3L-PCNA interaction important for error free TLS over UV induced DNA lesions in human cells**

Synnøve Brandt Ræder<sup>1</sup>, Anala Nepal<sup>1,2,#</sup>, Karine Øian Bjørås<sup>1,#</sup>, Mareike Seelinger<sup>1,#</sup>, Rønnaug Steen Kolve<sup>1</sup>, Aina Nedal<sup>1</sup>, Rebekka Müller<sup>1</sup> and Marit Otterlei<sup>1,2\*</sup>.

<sup>1</sup>Department of Clinical and Molecular Medicine, Faculty of Medicine and Health Sciences, Norwegian University of Science and Technology (NTNU), Trondheim, Norway

<sup>2</sup>Clinic of Surgery, St. Olavs Hospital, Trondheim University Hospital, Trondheim, Norway

#Equal contributions

## Supplementary Figure S1

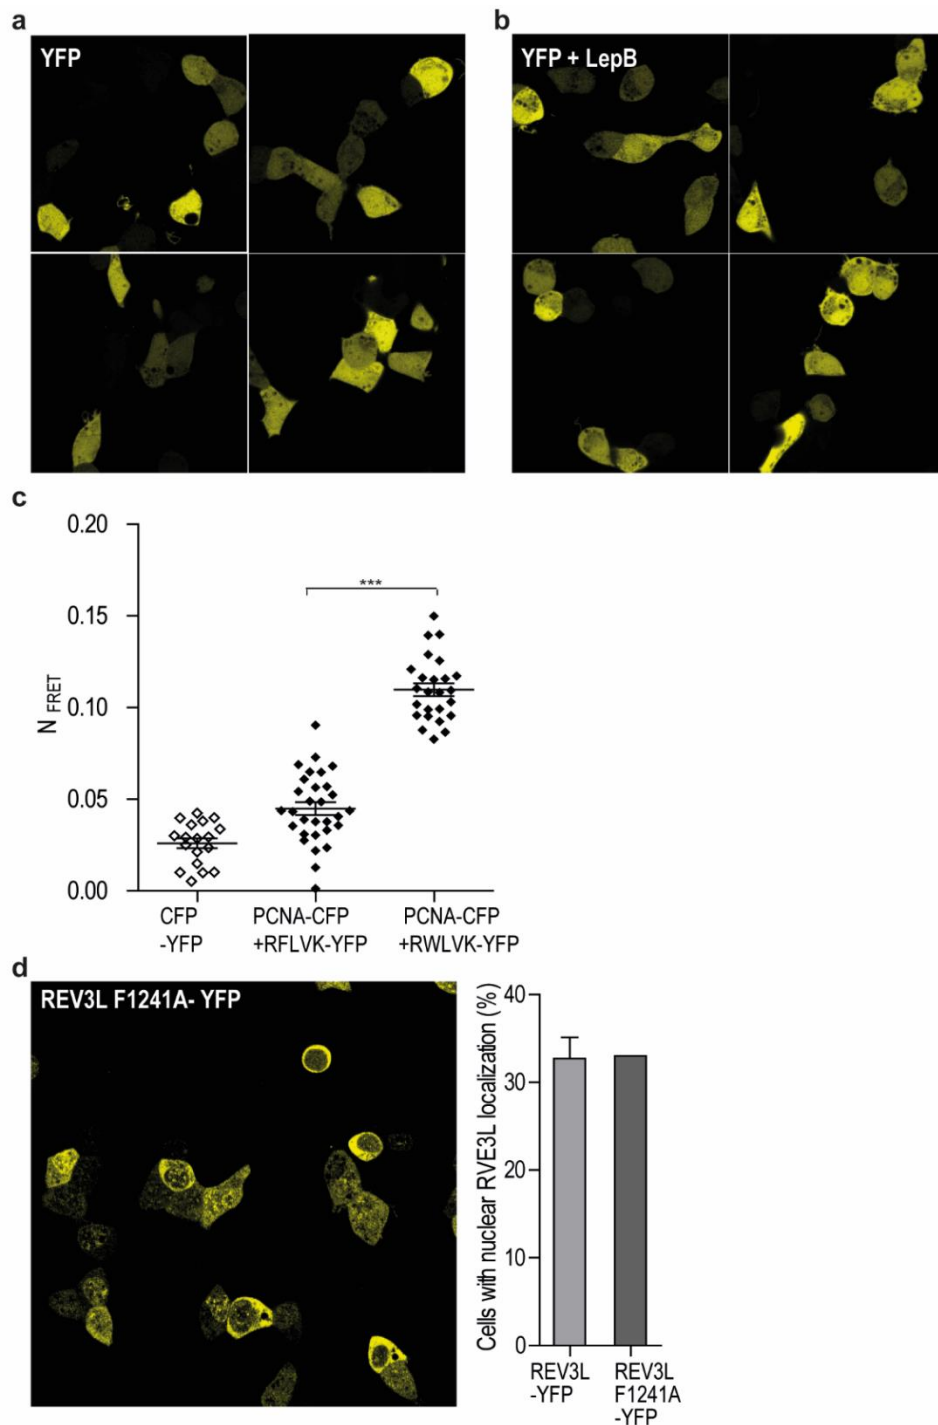

**Supplementary Figure S1, related to Figure 1.** Subcellular localization of YFP and REV3L F1241A-YFP and FRET between PCNA and APIM variants. **(a)** Overview of subcellular localization of YFP expressed in HEK293T cells. **(b)** Overview of subcellular localization of YFP expressed in HEK293T cells with Leptomycin B treatment (10 ng/ml, after 1 hour treatment). **(c)** Normalized FRET measurement between overexpressed PCNA-CFP and RFLVK-YFP or RWLVK-YFP in HeLa cells. CFP-YFP (vectors only) was used as background control. Data is from one out of 2 similar experiments. The p-value (\*\*\*) =  $p > 0.0001$  is calculated from a two-tailed unpaired t-test. **(d)** *Left panel:* Overview of subcellular localization of REV3L F1241A- YFP in HEK293T cells. *Right panel:* Quantification of REV3L F1241A-YFP nuclear localization (dark grey bar) from one experiment with in total 267

cells, compared with the quantified REV3L-YFP nuclear localization (light grey bar) also shown previously in Fig. 1b and 5b.

**Supplementary Table S1, related to Figure 1.** All proteins pulled down with REV3L-YFP used for gene ontology (GO) analysis. **(a)** Proteins immunoprecipitated from REV3L-YFP expressing cells. Only proteins detected in maximum one out of three IPs from similarly crosslinked YFP-expressing cell are included. Only proteins detected with average sequest score larger than 5 is regarded as a significant detection. Proteins found in the CRAPome database at a frequency of more than 50% of experiments with magnetic Dynabeads are shown in *italic*. These are excluded from the list prior to the GO analysis shown in Fig. 1c. **(b)** GO-analysis of complete list shown in (a) using a PANTHER overrepresentation test. GO biological processes with a Benferroni corrected P-value <0.05 are shown. P-values given as false discovery rate (FDR).

**a**

| Uniprot ID | Symbol  | Description                                                | Average sequest score |       | #Replica detected |       | CRAPome frequency occurrence (%) |
|------------|---------|------------------------------------------------------------|-----------------------|-------|-------------------|-------|----------------------------------|
|            |         |                                                            | EYFP                  | REV3L | EYFP              | REV3L |                                  |
| P52292     | KPNA2   | <i>Importin subunit alpha-1</i>                            | 4                     | 36    | 0                 | 3     | 63                               |
| Q03252     | LMNB2   | <i>Lamin-B2</i>                                            | 3                     | 13    | 0                 | 3     | 58                               |
| P49005     | POLD2   | DNA polymerase delta subunit 2                             |                       | 17    | 0                 | 3     | 5                                |
| Q15054     | POLD3   | DNA polymerase delta subunit 3                             |                       | 11    | 0                 | 3     | 2,6                              |
| O60884     | DNAJA2  | DnaJ homolog subfamily A member 2                          | 3                     | 11    | 0                 | 3     | 50                               |
| P34932     | HSPA4   | Heat shock 70 kDa protein 4                                | 3                     | 8     | 0                 | 3     | 39                               |
| O60673     | DPOLZ   | DNA polymerase zeta catalytic subunit                      | 6                     | 671   | 1                 | 3     | 0                                |
| P45880     | VDAC2   | <i>Voltage-dependent anion-selective channel protein 2</i> | 7                     | 14    | 1                 | 3     | 58                               |
| Q9Y265     | RUVB1   | <i>RuvB-like 1</i>                                         | 7                     | 29    | 1                 | 3     | 66                               |
| O00410     | IPO5    | Importin-5                                                 | 7                     | 31    | 1                 | 3     | 31,6                             |
| Q9Y230     | RUVB2   | <i>RuvB-like 2</i>                                         | 7                     | 28    | 1                 | 3     | 58                               |
| P02545     | LMNA    | <i>Prelamin-A/C</i>                                        | 7                     | 22    | 1                 | 3     | 71                               |
| P55060     | CSE1L   | Exportin-2                                                 | 14                    | 30    | 1                 | 3     | 45                               |
| Q9Y2L1     | DIS3    | Exosome complex exonuclease RRP44                          | 11                    | 15    | 1                 | 3     | 13                               |
| O75694     | NUP155  | Nuclear pore complex protein Nup155                        | 4                     | 13    | 1                 | 3     | 42                               |
| Q00341     | HDLBP   | Vigilin                                                    | 4                     | 8     | 1                 | 3     | 18                               |
| Q14204     | DYNC1H1 | <i>Cytoplasmic dynein 1 heavy chain 1</i>                  | 12                    | 22    | 1                 | 3     | 53                               |
| P62906     | RPL10A  | <i>60S ribosomal protein L10a</i>                          | 3                     | 5     | 0                 | 2     | 58                               |
| P46060     | RANGAP1 | Ran GTPase-activating protein 1                            | 3                     | 6     | 0                 | 2     | 45                               |
| P31689     | DNAJA1  | DnaJ homolog subfamily A member 1                          | 9                     | 14    | 0                 | 2     | 50                               |
| Q13765     | NACA    | Nascent polypeptide-associated complex subunit alpha       | 7                     | 6     | 0                 | 2     | 45                               |
| O95373     | IPO7    | Importin-7                                                 | 14                    | 37    | 0                 | 2     | 26                               |
| P33992     | MCM5    | <i>DNA replication licensing factor MCM5</i>               | 3                     | 6     | 0                 | 2     | 55                               |
| P49588     | AARS    | Alanine--tRNA ligase, cytoplasmic                          | 4                     | 9     | 0                 | 2     | 29                               |
| Q16531     | DDB1    | DNA damage-binding protein 1                               |                       | 7     | 0                 | 2     | 50                               |
| Q81X12     | CCAR1   | Cell division cycle and apoptosis regulator protein 1      | 2                     | 6     | 0                 | 2     | 26                               |
| Q86VP6     | CAND1   | Cullin-associated NEDD8-dissociated protein 1              | 3                     | 6     | 0                 | 2     | 45                               |
| Q9Y5V3     | MAGED1  | Melanoma-associated antigen D1                             |                       | 6     | 0                 | 2     | 47                               |
| Q6Y7W6     | GIGYF2  | PERQ amino acid-rich with GYF domain-containing prot 2     | 3                     | 8     | 0                 | 2     | 13                               |
| Q92598     | HSPH1   | Heat shock protein 105 kDa                                 | 3                     | 5     | 0                 | 2     | 26                               |
| Q92616     | GCN1L1  | Translational activator GCN1                               | 2                     | 12    | 0                 | 2     | 34                               |

**b**

| GO biological process                                   | Detected proteins                      | FDR      |
|---------------------------------------------------------|----------------------------------------|----------|
| Protein import into nucleus                             | KPNA2, LMNA, NUP155, IPO7, IPO5, CSE1L | 3,13E-05 |
| Response to unfolded protein                            | LMNA, HSPA4, DNAJA1, HSPH1             | 4,56E-02 |
| DNA-dependent DNA replication                           | MCM5, POLD2, POLD3, REV3L              | 3,00E-02 |
| Nucleotide excision repair, DNA incision, 5'- to lesion | POLD2, POLD3, DDB1                     | 2,99E-02 |
| Translesion synthesis                                   | POLD2, POLD3, REV3L                    | 2,85E-02 |
| DNA damage response, detection of DNA damage            | POLD2, POLD3, DDB1                     | 2,78E-02 |

## Supplementary Figure S2

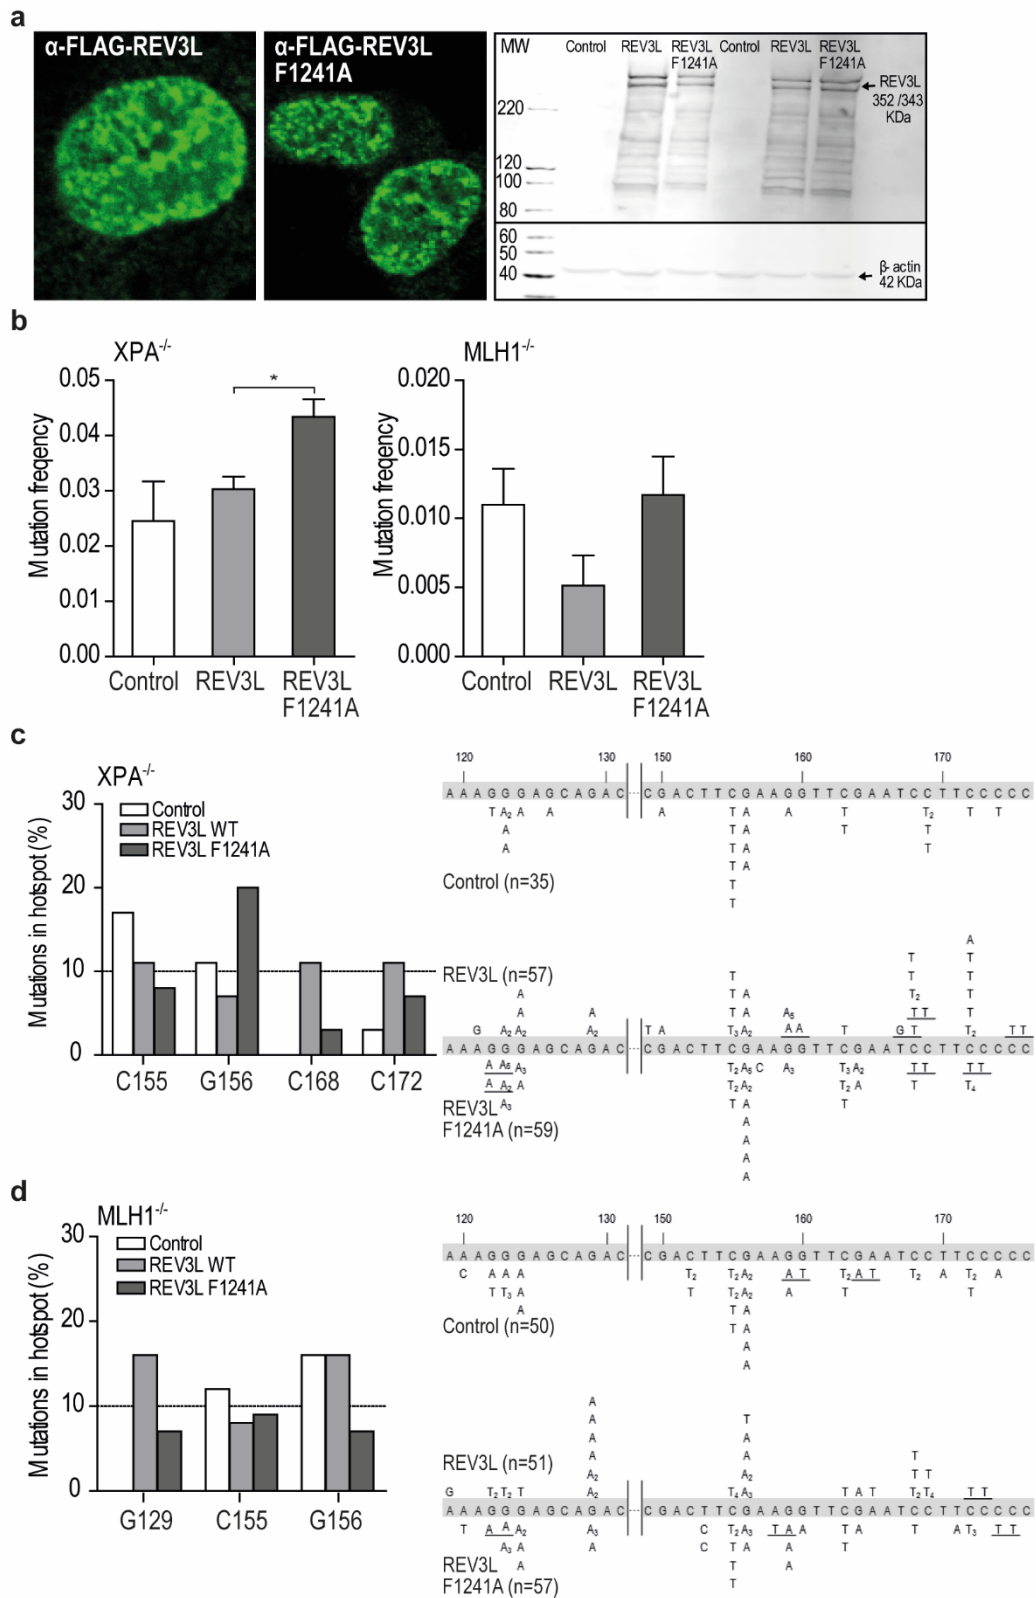

**Supplementary Figure S2, related to Figure 3.** Mutation frequencies and mutation spectra in  $XPA^{-/-}$  and  $MLH1^{-/-}$  deficient cell lines after overexpression of REV3L or REV3L F1241A. **(a)** *Left panel:* Determination of expression levels of FLAG-tagged REV3L and REV3L F1241A by immunofluorescence in HCT116 cells. *Right panel:* Western blot showing expression of FLAG-tagged REV3L and REV3L F1241A in two representative independent experiments (transfections) in HEK293T cells. At least six transfections in HEK293T, HCT116 or  $XPA^{-/-}$  cell lines

showed similar results. Western blot analysis was performed as previously described (Olaisen et al., 2015, *Cellular signalling*. 27, (7), 1478-87). Bands below REV3L indicate some degradation of the overexpressed constructs, as these are not detected in the control. **(b)** Mutation frequency determined by SupF assay in XPA<sup>-/-</sup> (NER deficient) and MLH1<sup>-/-</sup> (HCT116, MMR deficient) cells. REV3L WT-FLAG, REV3L F1241A-FLAG or YFP were co-transfected with the UV irradiated reporter plasmid pSP189 (600 and 800 mJ/cm<sup>2</sup> respectively). Cells expressing YFP represents the control. Minimum three independent experiments are shown for each cell line. Students two-tailed paired t-test were performed, \**p*<0.05. **(c-d)** Mutation spectra (*supF* gene) isolated from cells overexpressing REV3L-FLAG, REV3L F1241A-FLAG or YFP (control) in (c) XPA<sup>-/-</sup> cells and (d) MLH1<sup>-/-</sup> cells from three independent experiments. *Left panel*: Mutations at sites from the *supF* gene occurring with a frequency >10% in either control-(white bars), REV3L- (light grey bars) or REV3L F1241A-expressing (dark grey bars) cells. *Right panel*: Mutation spectra. The number in subscript indicates how many times the specific mutation was detected in the same transformation. Tandem mutations are underlined.

### Supplementary Figure S3

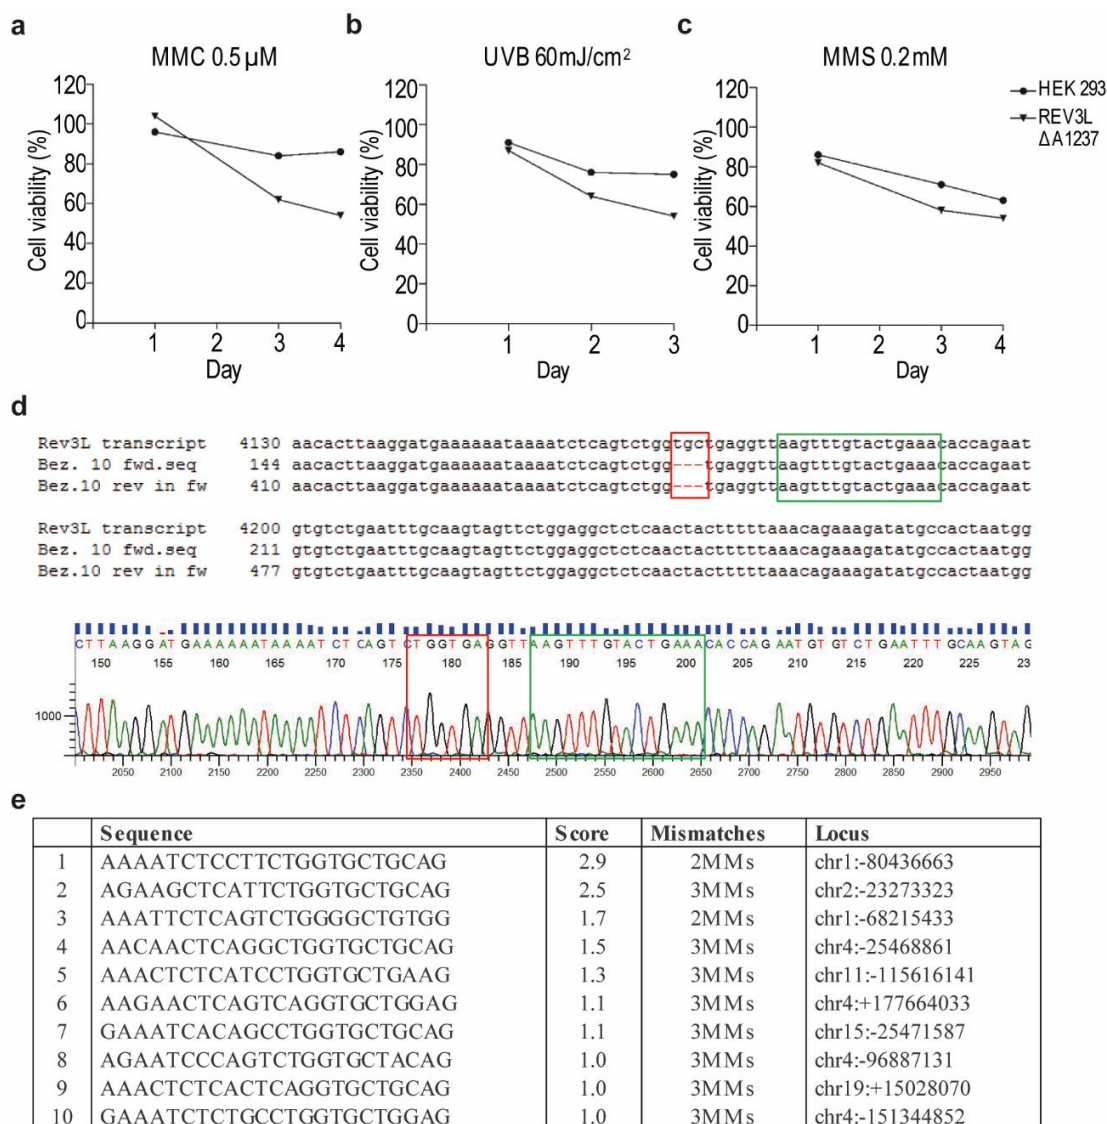

**Supplementary Figure S3, related to Figure 4 and 5.** Characterization of the REV3L  $\Delta$ A1237 cell line. **(a-c)** Viability of HEK293 and REV3L  $\Delta$ A1237 after different treatments (treated on day 0). Cells treated with (a)

mitomycin C (MMC), 0.5  $\mu$ M (b) UVB-irradiation (UVB), 60 mJ/cm<sup>2</sup> and (c) methyl methanesulfonate (MMS), 0.2 mM. One representative experiments out of three independent experiments is presented. **(d)** Confirmation of the deletion of A1237 in REV3L by genome sequencing. *Upper panel:* Genomic REV3L transcript variant 1 isoform gene aligned with REV3L sequenced from REV3L deletion mutant cell line REV3L  $\Delta$ A1237 (forward and reverse sequence) aligned using software Clone Manager 9. Deleted codon marked with red box, APIM marked with green box. *Lower panel:* Sequence chromatogram from REV3L  $\Delta$ A1237 investigated in software Sequence Scanner v1.0. Codon triplet upstream and downstream the deleted codon marked with a red box, APIM marked with green box. **(e)** OFF-targets of guide RNA used for mutating genomic REV3L in HEK293 cells with CRISPR/Cas9. Guide RNA sequence including PAM sequence (AAAATCTCAGTCTGGTGCTGAGG) analysed by CRISPR design tool <http://crispr.mit.edu/>. ON-target chr6:+111695842 (quality score 59), 279-OFF targets found in human genome (18 in genes).

### Supplementary Figure S4

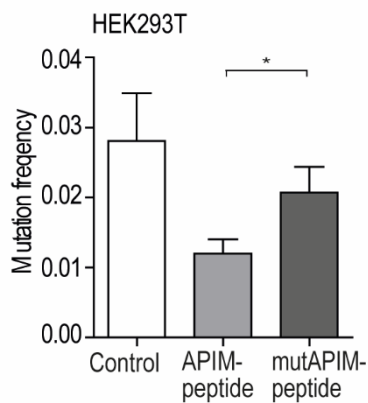

**Supplementary Figure S4, related to Figure 6.** Mutation frequency after treatment with APIM-peptide variants. APIM-peptide, but not the mutAPIM-peptide, reduced the mutation frequency in HEK293T. Mutation frequency determined by the SupF assay after treatment with APIM-peptide or mutAPIM-peptide (10  $\mu$ M). Data from four independent experiments. Two-tailed paired t-test (\*= $p < 0.05$ ).
